# Supplementary material
Source: Copernicus journal article supplement (doi:10.5194/bg-23-4037-2026)
Supplement: Supplementary file 1 [file bg-23-4037-2026-supplement.pdf]

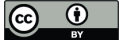

*Supplement of*

## **Revealing hidden oxygen variability in the North Pacific: a two-decade analysis using GOBAI-O<sub>2</sub>**

**Miho Ishizu and Tomomichi Ogata**

*Correspondence to:* Miho Ishizu ([mishizu@pusan.ac.kr](mailto:mishizu@pusan.ac.kr))

The copyright of individual parts of the supplement might differ from the article licence.

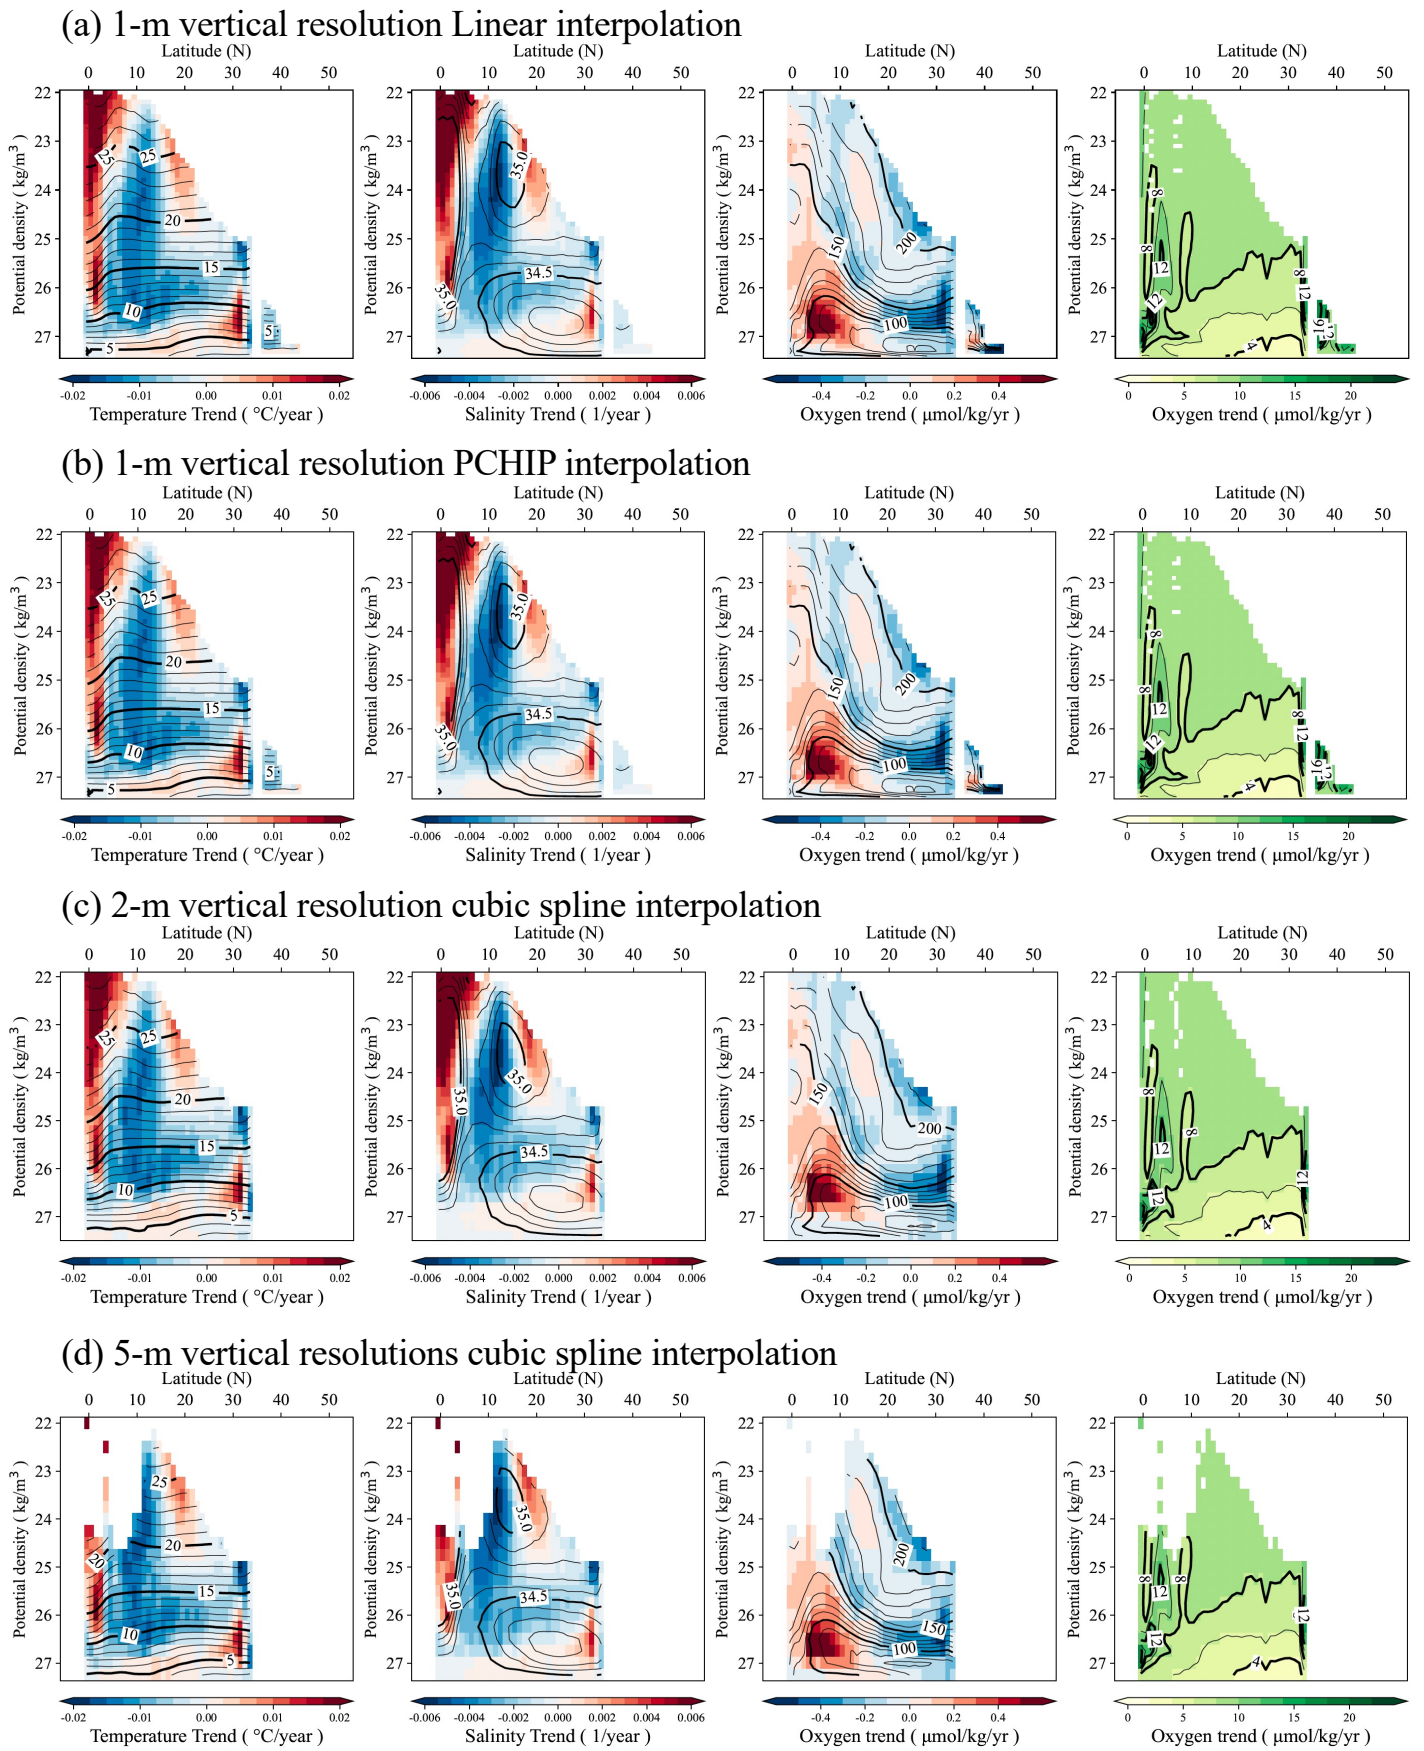

Figure S1. Linear trends in potential temperature, salinity, dissolved O<sub>2</sub> and uncertainty on each isopycnal horizon in 137° E lines. The figures are the same as Figure 4, but using 1° × 1° × 1 m grid data generated with linear (a) and RCHIP (b) interpolation methods. The 1° × 1° × 2 m and 1° × 1° × 5 m grid data generated data with cubic spline interpolation, respectively. Contour lines represent the mean values during the target observation periods, plotted at density intervals of 0.1σ<sub>0</sub> (a, b), 0.25σ<sub>0</sub> (c, d) for each 1 deg, respectively.

(a) 1-m vertical resolution Linear interpolation

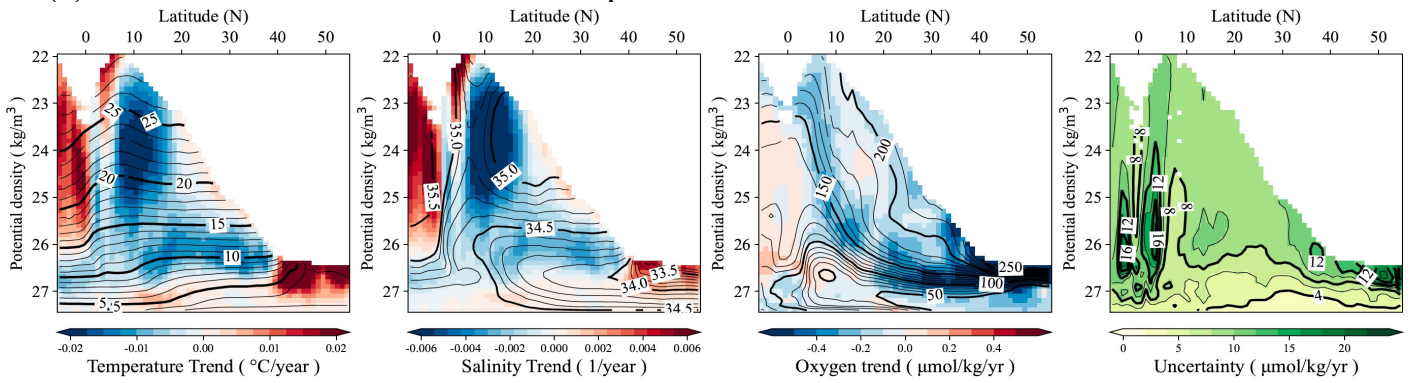

(b) 1-m vertical resolution PCHIP interpolation

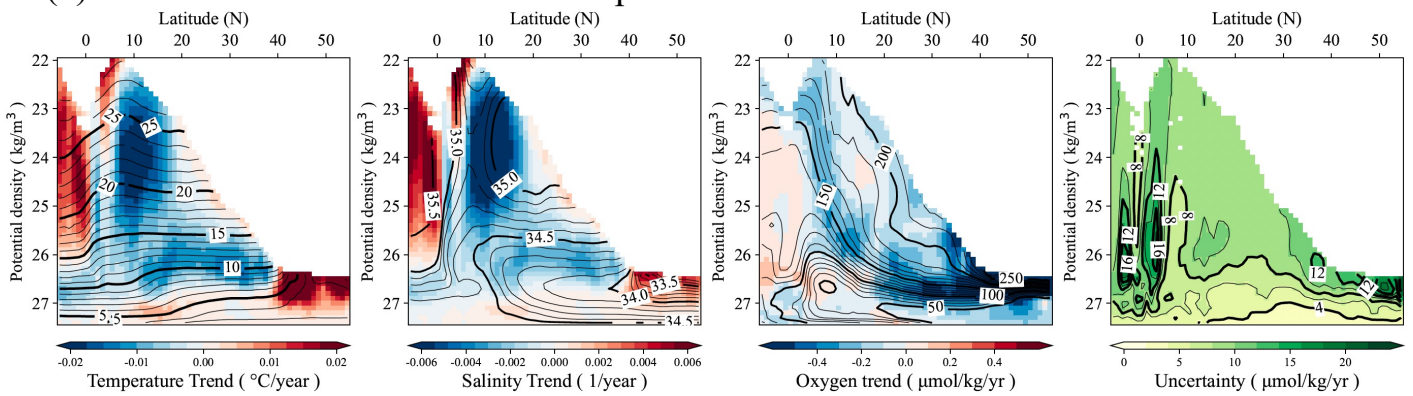

(c) 2-m vertical resolution cubic spline interpolation

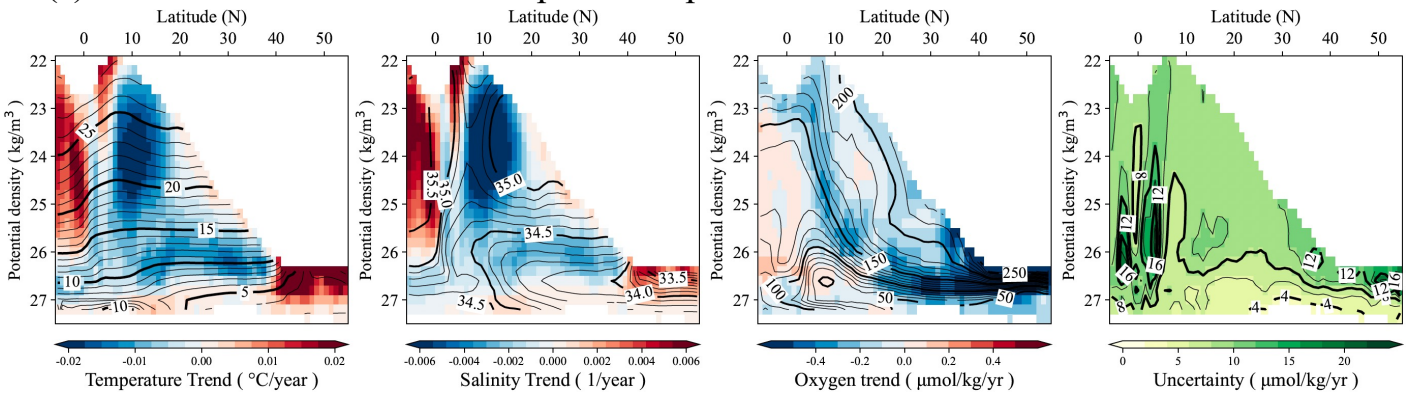

(d) 5-m vertical resolution cubic spline interpolation

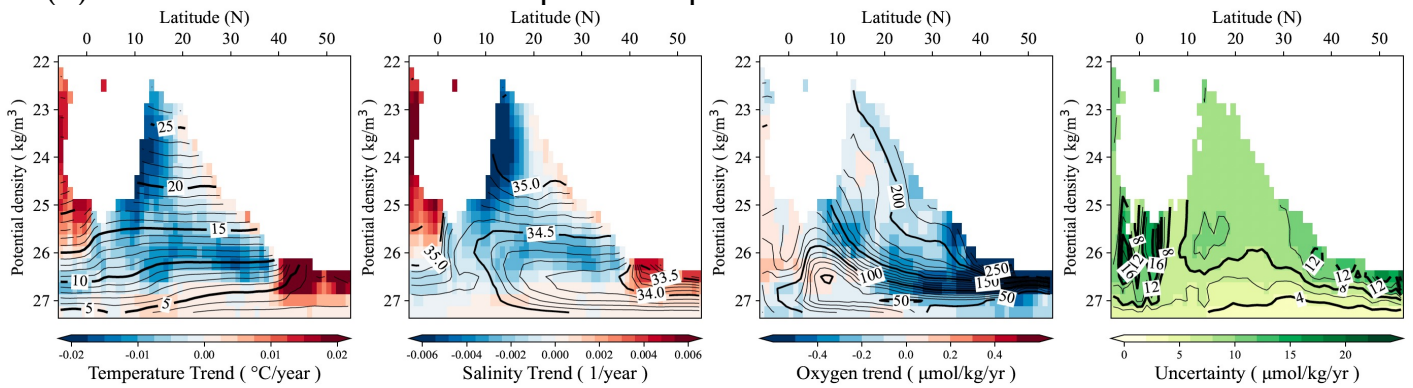

Figure S2. Same as Fig. S1, but in  $165^{\circ}$  E lines.

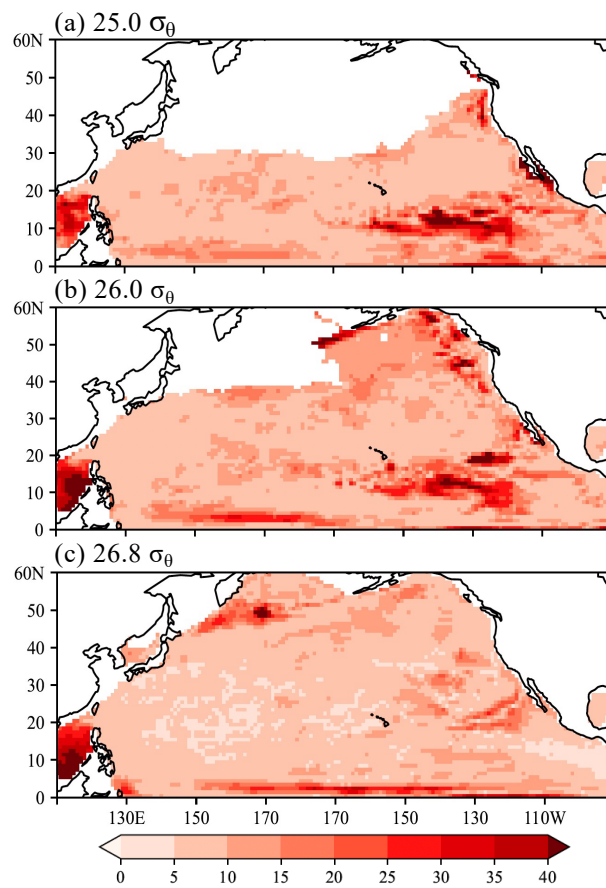

Figure S3. Uncertainty estimates of dissolved oxygen concentration ( $\mu\text{mol/kg}$ ) along the isopycnal surface of  $25.0$  (a),  $26.0$  (b), and  $26.8\sigma_\theta$  (c). The uncertainty data is based on GOBAI- $\text{O}_2$  data [ Sharp et al. 2023 ].

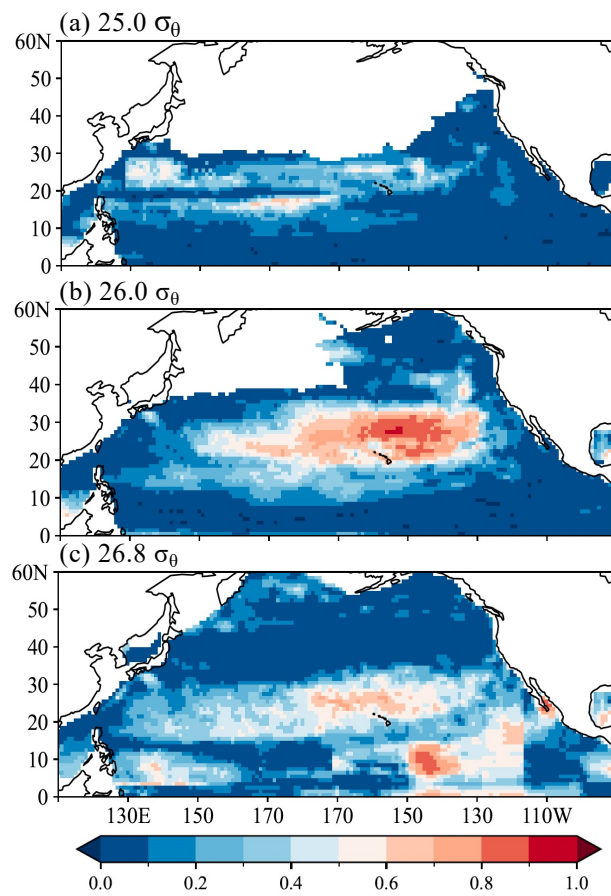

Figure S4. Coefficient of determination for linear regression lines along the isopycnal surface of  $25.0$  (a),  $26.0$  (b), and  $26.8\sigma_\theta$  (c).

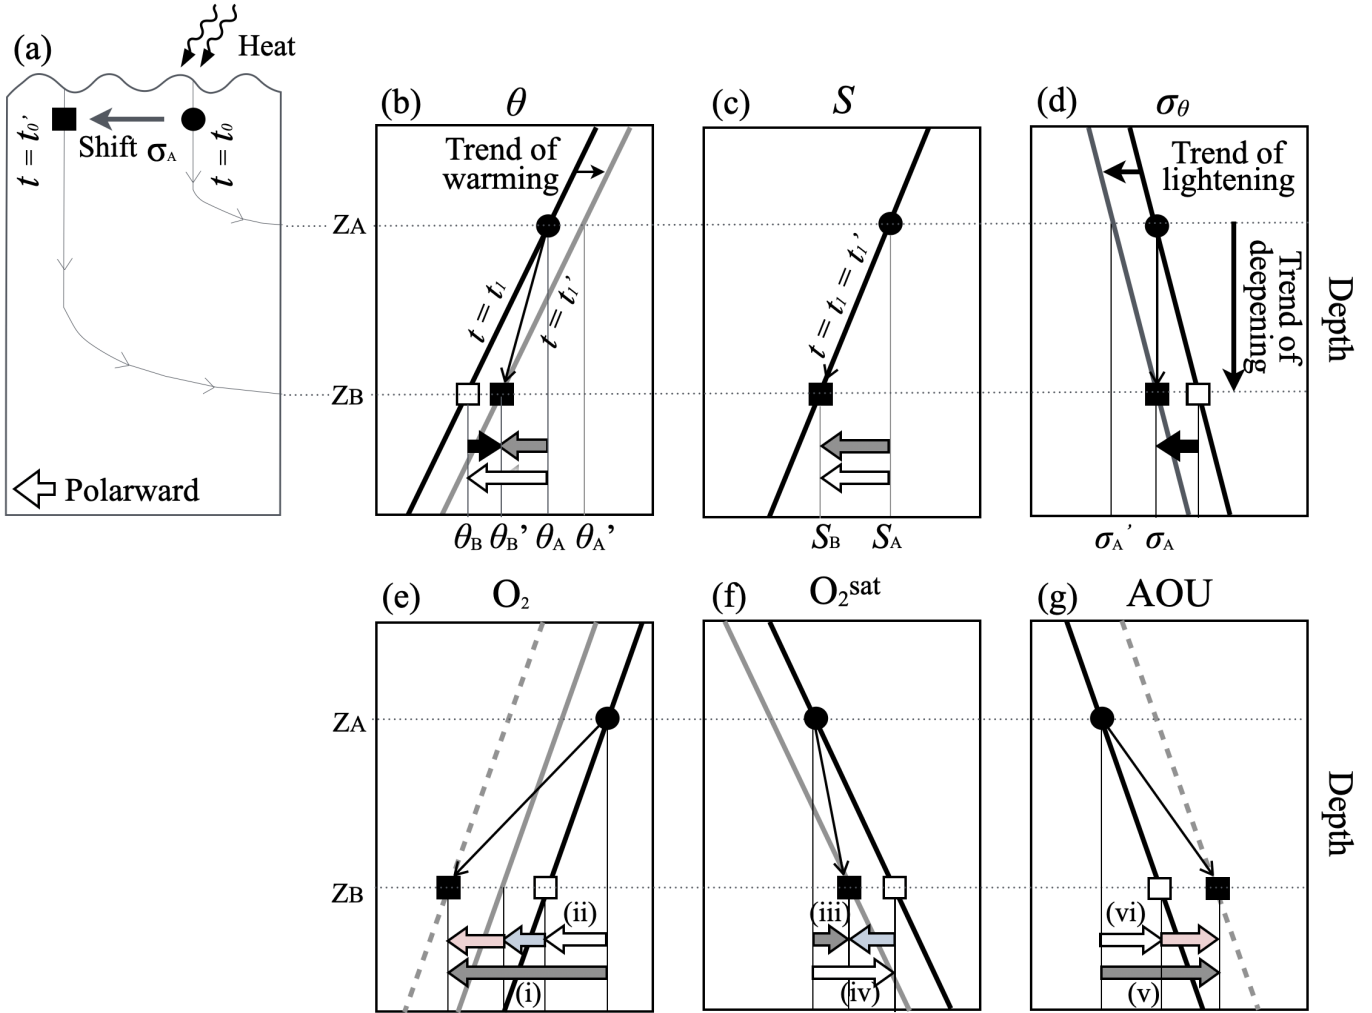

Figure S5. Schematic illustration of the temporal evolution of parameters on a typical (a) isopycnal horizon above a salinity minimum layer: (b) potential temperature ( $\theta$ ), (c) salinity ( $S$ ), (d) potential density ( $\sigma_\theta$ ), (e) dissolved oxygen ( $O_2$ ), (f) oxygen saturation ( $O_2^{\text{sat}}$ ), (g) apparent oxygen utilization (AOU). Thick black (gray) lines indicate the vertical profiles before (after) warming at a time  $t_1$  ( $t_1'$ ). Dashed gray lines represent profiles after warming, accompanied by a concurrent increase in AOU (e, g). Dotted lines in panel (d) denote the isopycnal horizons considered here. Closed circles and squares denote water parcels observed at a depth  $z_A$  and  $z_B$ , respectively, at times between time  $t_0$  and  $t_1$ . The time refers to the period between each parcel submergence. Large gray arrows indicate the observed temporal changes along a density horizon ( $\partial X/\partial t$ ), while large white arrows denote apparent changes by the vertical deepening effect ( $\partial X/\partial z \cdot \partial z/\partial t$ ). Large blue and pink arrows in panels (e–g) represent net change (= gray arrow - white arrow). The blue and pink (e–g) arrows with identical patterns indicate identical processes. Arrows labeled with Roman numerals correspond to the respective terms in equation (2). These schematics are after Sasano et al. (2015).

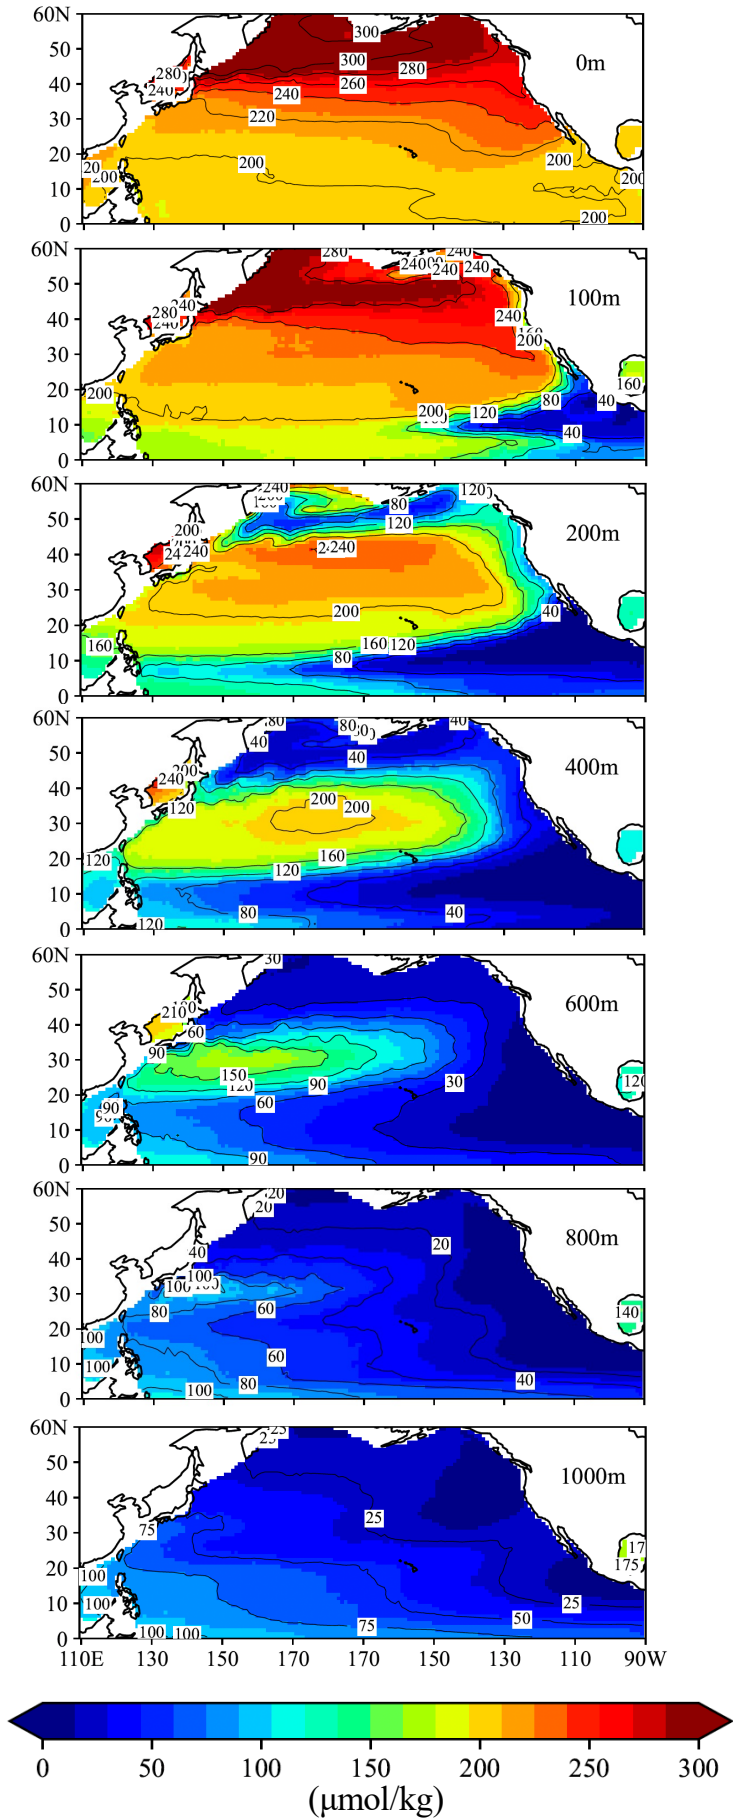

Figure S6. Horizontal distribution of averaged dissolved  $\text{O}_2$  ( $\mu\text{mol/kg}$ ) at depths of 0, 100, 200, 400, 600, 800, and 1000 m, respectively, during 2004–2023.
